# Supplementary material for: Activation of the P2RX7/IL-18 pathway in immune cells attenuates lung fibrosis
Source: eLife journal article supplement (doi:10.7554/elife.88138), 2023-06-06

**Panel 4F**

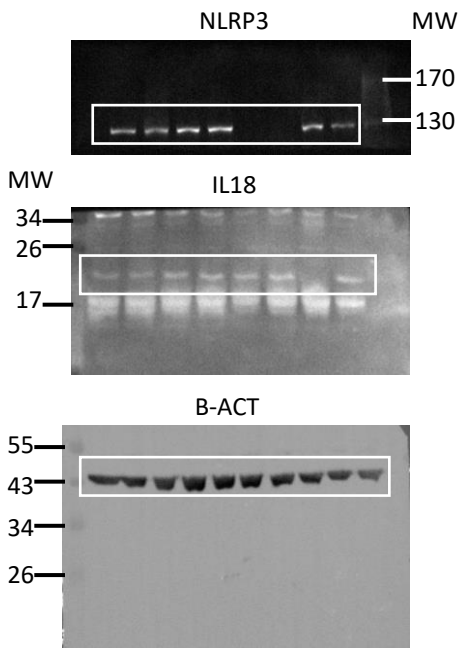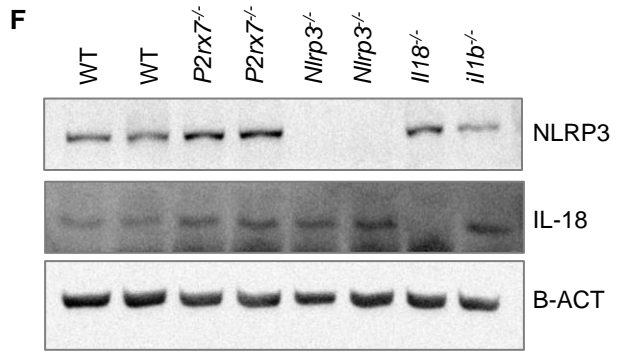

Supplement: fig4-figsupp2-data5 [file elife-88138-fig4-figsupp2-data5-v1.pdf]
