# Supplementary material for: Activation of the P2RX7/IL-18 pathway in immune cells attenuates lung fibrosis
Source: eLife. 2024 Feb 1;12:RP88138. doi: 10.7554/eLife.88138 (PMC10945561; doi:10.7554/eLife.88138)
Supplement: Figure 1—figure supplement 1—source data 1. [file elife-88138-fig1-figsupp1-data1.xlsx]

## Sheet: Fig 1 Sup fig1
NLRP3 healthy vs IPF			PYCARD healthy vs IPF			CASP1 healthy vs IPF			GSDMD healthy vs IPF
	Control	IPF		Control	IPF		Control	IPF		Control	IPF
1	10.841		1	10.896		1	11.455		1	9.7774
2	9.4603		2	11.413		2	12.505		2	10.655
3	9.9653		3	11.849		3	12.007		3	10.195
4	10.468		4	11.81		4	12.329		4	10.091
5	10.083		5	12.682		5	12.706		5	9.9141
6	10.479		6	11.697		6	12.427		6	9.9018
7	10.767		7	11.839		7	12.357		7	10.67
8	9.8539		8	11.795		8	12.624		8	10.194
9	10.844		9	12.238		9	12.268		9	10.752
10	11.801		10	12.276		10	12.12		10	10.672
11	8.4311		11	11.599		11	11.911		11	10.75
12	9.4936		12	12.14		12	12.483		12	10.241
13	9.5529		13	12.398		13	12.358		13	11.058
14	10.282		14	12.196		14	12.28		14	11.057
15	9.6672		15	12.157		15	11.869		15	10.788
16	10.236		16	11.779		16	12.361		16	10.387
17	12.631		17	11.827		17	11.886		17	10.29
18	10.544		18	11.871		18	12.43		18	10.465
19	10.125		19	11.828		19	12.467		19	10.26
20	9.4665		20	11.812		20	12.264		20	10.328
21	10.2		21	12.141		21	12.711		21	10.087
22	9.0045		22	11.887		22	12.444		22	10.165
23	11.016		23	11.834		23	12.466		23	10.059
24	8.9371		24	11.871		24	12.06		24	10.788
25	10.064		25	11.647		25	12.689		25	9.9798
26	12.781		26	12.562		26	11.886		26	11.439
27	10.533		27	11.677		27	12.235		27	10.478
28	11.002		28	11.25		28	12.101		28	9.8122
29	11.801		29	11.353		29	11.819		29	10.583
30	10.402		30	11.966		30	11.167		30	11.417
31	9.6342		31	12.558		31	12.638		31	10.299
32	11.97		32	11.749		32	12.478		32	10.417
33	9.4764		33	11.433		33	12.517		33	10.085
34	11.982		34	11.726		34	12.234		34	10.062
35	9.9286		35	11.888		35	12.414		35	10.062
36	9.447		36	11.794		36	12.09		36	10.111
37	10.18		37	11.426		37	12.072		37	10.27
38	10.285		38	11.826		38	12.721		38	10.481
39	10.155		39	11.452		39	12.25		39	10.322
40	10.162		40	11.531		40	12.295		40	10.366
41	11.772		41	11.758		41	12.094		41	10.44
42	9.0878		42	11.228		42	12.362		42	11.106
43	9.7396		43	11.325		43	12.586		43	10.321
44	10.91		44	12.04		44	12.528		44	10.444
45	11.041		45	12.513		45	12.405		45	10.447
46	11.342		46	11.678		46	12.436		46	10.05
47	10.675		47	11.597		47	12.111		47	10.263
48	9.8055		48	11.565		48	12.641		48	9.7548
49	9.7132		49	11.597		49	12.573		49	10.663
50	9.3908		50	11.984		50	12.134		50	10.368
51	11.646		51	11.306		51	12.465		51	10.758
52	11.747		52	11.298		52	12.205		52	10.366
53	9.9904		53	12.002		53	12.467		53	10.67
54	10.213		54	12.617		54	12.469		54	10.462
55	10.418		55	11.602		55	11.898		55	10.611
56	10.466		56	11.265		56	12.229		56	10.271
57	9.3114		57	11.394		57	12.17		57	10.357
58	9.5907		58	12.068		58	12.757		58	10.629
59	11.471		59	11.709		59	12.283		59	10.28
60	9.2567		60	11.427		60	12.378		60	10.626
61	10.376		61	11.434		61	12.5		61	10.529
62	9.3543		62	12.274		62	12.608		62	10.522
63	9.3792		63	11.719		63	12.269		63	10.083
64	9.901		64	11.822		64	12.374		64	10.132
65	10.517		65	11.535		65	11.861		65	10.141
66	13.015		66	11.628		66	12.723		66	10.644
67	10.619		67	11.585		67	12.304		67	9.5137
68	8.6497		68	12.262		68	12.064		68	10.59
69	12.063		69	12.334		69	12.527		69	10.681
70	11.469		70	11.692		70	12.27		70	10.416
71	9.7479		71	11.885		71	12.665		71	10.126
72	9.3944		72	11.726		72	12.463		72	10.582
73	9.8595		73	11.637		73	12.41		73	10.978
74	11.473		74	12.359		74	12.539		74	10.084
75	9.8132		75	11.69		75	12.637		75	10.131
76	11.743		76	11.833		76	12.521		76	10.693
77	10.173		77	11.781		77	12.553		77	10.625
78	11.635		78	11.879		78	12.664		78	10.085
79	9.4439		79	12.201		79	12.672		79	10.423
80	10.908		80	11.682		80	12.286		80	9.9756
81	10.637		81	11.254		81	12.789		81	10.703
82	9.3242		82	11.172		82	11.607		82	9.9831
83	10.884		83	11.606		83	12.423		83	10.384
84	12.02		84	11.236		84	12.346		84	9.9407
85	9.0413		85	11.263		85	12		85	10.279
86	10.87		86	11.196		86	11.984		86	10.379
87	10.604		87	12.045		87	12.623		87	10.515
88	9.6474		88	11.446		88	12.662		88	10.364
89	9.6205		89	11.563		89	12.435		89	10.324
90	11.19		90	11.519		90	12.298		90	9.8782
91	10.051		91	11.654		91	12.169		91	10.398
92		10.263	92		11.999	92		11.696	92		10.096
93		11.129	93		11.197	93		11.34	93		9.9737
94		10.717	94		10.894	94		11.198	94		9.9378
95		12.063	95		11.889	95		12.209	95		10.115
96		9.9339	96		11.517	96		11.34	96		9.8287
97		10.053	97		12	97		12.024	97		9.9747
98		9.0224	98		11.297	98		11.259	98		9.9791
99		9.4124	99		11.46	99		11.757	99		10.009
100		9.1271	100		11.631	100		11.606	100		10.097
101		8.6397	101		11.372	101		11.372	101		10.354
102		9.5538	102		12.14	102		12.521	102		10.217
103		9.8006	103		11.732	103		12.064	103		9.9998
104		9.41	104		11.364	104		11.586	104		10.454
105		8.7589	105		11.493	105		11.104	105		10.38
106		9.5933	106		11.79	106		12.344	106		10.306
107		10.082	107		12.26	107		12.276	107		10.043
108		9.7649	108		12.163	108		12.352	108		10.296
109		9.615	109		11.409	109		11.678	109		9.7536
110		10.19	110		12.096	110		12.124	110		9.9233
111		10.538	111		11.777	111		12.179	111		9.8744
112		8.9442	112		11.678	112		11.885	112		9.9252
113		9.6223	113		11.766	113		12.264	113		9.6139
114		8.9809	114		11.793	114		12.304	114		10.111
115		9.8541	115		11.42	115		11.17	115		10.001
116		9.7128	116		11.918	116		11.728	116		10.332
117		9.8246	117		11.603	117		12.702	117		10.765
118		9.8292	118		11.338	118		11.972	118		10.109
119		9.7688	119		11.514	119		12.04	119		9.7547
120		10.051	120		12.145	120		12.724	120		9.9259
121		9.8733	121		11.99	121		12.014	121		9.8632
122		9.8054	122		11.803	122		11.679	122		10.417
123		10.078	123		11.505	123		11.759	123		10.163
124		9.9714	124		12.16	124		12.007	124		10.05
125		9.3114	125		11.921	125		12.207	125		10.076
126		9.5345	126		11.414	126		11.423	126		10.131
127		9.977	127		12.286	127		11.92	127		10.245
128		9.9482	128		11.381	128		11.465	128		10.213
129		9.4759	129		12.076	129		12.333	129		10.482
130		9.7552	130		11.819	130		11.542	130		10.221
131		10.43	131		12.12	131		11.865	131		10.164
132		10.198	132		10.557	132		10.915	132		9.8892
133		9.0236	133		11.511	133		11.693	133		9.8793
134		9.4371	134		11.482	134		11.807	134		9.8173
135		10.2	135		11.592	135		11.697	135		9.7878
136		9.37	136		11.742	136		11.845	136		9.8579
137		10.478	137		11.909	137		12.106	137		10.288
138		9.665	138		11.591	138		11.78	138		9.9766
139		10.944	139		12.44	139		12.743	139		10.582
140		9.9045	140		11.916	140		12.411	140		10.334
141		9.755	141		11.443	141		12.35	141		10.516
142		10.492	142		11.764	142		12.44	142		9.8333
143		10.024	143		11.414	143		11.954	143		10.171
144		9.749	144		11.72	144		12.497	144		10.285
145		9.8875	145		11.578	145		12.266	145		10.318
146		9.7573	146		11.552	146		11.736	146		9.741
147		10.8	147		12.156	147		12.256	147		10.704
148		9.9783	148		11.331	148		11.335	148		10.037
149		10.075	149		11.715	149		12.457	149		10.186
150		9.5958	150		11.295	150		11.862	150		10.191
151		9.6945	151		11.637	151		11.913	151		10.165
152		10.22	152		11.192	152		11.816	152		9.9973
153		10.064	153		11.719	153		11.724	153		10.098
154		9.4933	154		11.396	154		11.956	154		10.078
155		10.093	155		11.54	155		11.767	155		10.254
156		10.621	156		12.057	156		12.46	156		10.253
157		9.779	157		11.626	157		11.757	157		9.9678
158		9.1951	158		12.102	158		12.476	158		10.351
159		9.6083	159		11.829	159		11.94	159		10.229
160		10.049	160		12.009	160		12.006	160		9.709
161		10.14	161		11.838	161		11.771	161		9.6601
162		9.677	162		11.762	162		11.78	162		9.9038
163		9.7591	163		11.416	163		11.458	163		10.059
164		9.2882	164		11.802	164		11.762	164		10.422
165		11.959	165		12.151	165		12.237	165		10.089
166		9.9663	166		11.343	166		11.529	166		10.428
167		10.53	167		11.731	167		11.436	167		10.259
168		9.7864	168		11.485	168		11.774	168		10.223
169		9.6451	169		12.061	169		12.352	169		10.134
170		11.093	170		12.18	170		13.082	170		10.995
171		9.7885	171		11.97	171		12.234	171		9.631
172		10.306	172		11.896	172		12.658	172		10.331
173		9.6521	173		11.713	173		11.914	173		10.307
174		10.287	174		11.44	174		11.853	174		10.086
175		10.005	175		11.778	175		12.357	175		10.557
176		9.3459	176		11.469	176		11.62	176		10.046
177		10.121	177		11.758	177		12.447	177		10.169
178		10.002	178		11.887	178		12.009	178		10.498
179		9.5541	179		11.181	179		11.399	179		10.32
180		10.63	180		11.99	180		12.503	180		10.022
181		9.5997	181		11.81	181		12.12	181		9.9678
182		10.143	182		12.002	182		12.261	182		10.071
183		8.7807	183		11.293	183		11.716	183		9.9819
184		9.7512	184		11.545	184		11.949	184		10.187
185		10.227	185		11.779	185		11.997	185		10.076
186		9.8244	186		11.815	186		11.831	186		9.6553
187		9.7201	187		11.904	187		12.281	187		10.238
188		9.485	188		12.007	188		11.921	188		9.9019
189		9.3238	189		12.028	189		12.174	189		10.38
190		10.026	190		11.668	190		11.727	190		9.8653
191		9.7391	191		11.646	191		11.936	191		9.6609
192		9.7632	192		11.732	192		11.514	192		10.224
193		13.205	193		11.654	193		11.688	193		10.083
194		9.9452	194		11.354	194		11.826	194		9.6693
195		10.157	195		11.729	195		11.472	195		10.318
196		10.216	196		12.025	196		12.231	196		9.9383
197		10.535	197		11.557	197		11.832	197		9.7363
198		9.4447	198		11.326	198		11.562	198		9.7885
199		10.145	199		11.787	199		11.631	199		10.133
200		11.101	200		11.84	200		12.46	200		10.51
201		10.363	201		11.418	201		11.836	201		10.173
202		10.008	202		12.047	202		12.705	202		10.219
203		10.367	203		11.976	203		12.417	203		10.233
204		9.3603	204		11.604	204		11.859	204		9.8707
205		10.459	205		12.266	205		12.184	205		9.8075
206		9.7304	206		11.211	206		11.495	206		10.065
207		9.6125	207		11.8	207		11.827	207		9.9124
208		10.726	208		11.792	208		12.222	208		9.8972
209		9.9614	209		11.901	209		11.993	209		10.335
210		10.997	210		10.754	210		11.437	210		9.923
211		9.8533	211		11.816	211		11.953	211		9.8255
212		9.4218	212		11.806	212		12.534	212		10.317
213		9.3208	213		11.653	213		12.296	213		10.385
