# Supplementary material for: Activation of the P2RX7/IL-18 pathway in immune cells attenuates lung fibrosis
Source: eLife. 2024 Feb 1;12:RP88138. doi: 10.7554/eLife.88138 (PMC10945561; doi:10.7554/eLife.88138)
Supplement: Figure 1—source data 1. [file elife-88138-fig1-data1.xlsx]

## Sheet: Fig 1
P2RX7 healthy vs IPF				IL18 healthy vs IPF				IL18R1 HV vs IPF				IL18 Rap healthy vs IPF				IFNG healthy vs IPF
	control	IPF			Control	IPF			Control	IPF			Control	IPF			Control	IPF
1	4.4189			1	8.5297			1	11.378			1	10.762			1	2.4663
2	5.9626			2	9.4733			2	10.455			2	9.5416			2	5.8618
3	6.5202			3	9.6365			3	9.0461			3	9.3002			3	4.5313
4	6.212			4	9.0862			4	11.2			4	10.955			4	3.9265
5	5.9075			5	9.6716			5	7.9868			5	9.4658			5	4.4953
6	5.438			6	9.5874			6	9.5415			6	8.4699			6	4.4064
7	6.8936			7	8.7073			7	10.997			7	10.366			7	6.5553
8	6.5452			8	9.3086			8	8.8929			8	9.2899			8	7.3416
9	6.4601			9	8.5542			9	8.346			9	9.7528			9	4.2959
10	6.1037			10	8.2937			10	10.403			10	10.809			10	5.3327
11	5.776			11	9.1913			11	11.5			11	9.3342			11	4.9456
12	7.0525			12	9.6109			12	9.4825			12	9.725			12	5.1147
13	7.0306			13	8.7826			13	9.6543			13	10.164			13	5.5315
14	6.8016			14	8.6599			14	9.3284			14	10.006			14	5.872
15	7.3936			15	8.8869			15	9.2393			15	10.133			15	4.0287
16	5.8173			16	9.0057			16	9.4829			16	9.8201			16	4.8905
17	6.1046			17	8.2739			17	7.832			17	9.2596			17	5.7304
18	6.3528			18	9.524			18	10.368			18	10.964			18	5.7358
19	6.5			19	9.0935			19	8.9569			19	9.3666			19	5.49
20	6.4911			20	9.5883			20	9.6749			20	9.5092			20	4.0192
21	6.5763			21	9.2751			21	8.6089			21	8.992			21	6.6361
22	6.6854			22	9.6912			22	9.5959			22	9.4833			22	6.6446
23	5.3749			23	8.9821			23	9.9198			23	11.055			23	3.7914
24	5.7082			24	8.5354			24	10.225			24	9.6219			24	4.1214
25	6.6652			25	9.1218			25	10.512			25	10.365			25	5.8558
26	7.117			26	8.6032			26	6.6579			26	9.5588			26	5.4183
27	6.0841			27	8.9194			27	10.136			27	10.352			27	6.3259
28	5.3678			28	8.8457			28	9.6976			28	10.797			28	4.0659
29	5.3814			29	8.8471			29	10.399			29	11.065			29	3.4541
30	6.6849			30	7.2171			30	7.715			30	10.485			30	2.5523
31	6.769			31	9.4233			31	8.463			31	9.9304			31	3.8268
32	5.573			32	8.8806			32	9.9097			32	11.222			32	6.8416
33	6.2806			33	9.0422			33	9.6961			33	9.6325			33	4.5168
34	6.1097			34	9.581			34	10.426			34	11.677			34	7.5159
35	6.4856			35	9.2416			35	9.1749			35	10.265			35	5.6522
36	6.1071			36	8.8563			36	9.0934			36	10.11			36	6.4217
37	5.8618			37	9.0194			37	8.5632			37	8.7675			37	4.7999
38	6.9459			38	8.9401			38	8.2086			38	9.6659			38	6.5776
39	6.1377			39	9.4281			39	9.7276			39	8.8892			39	5.7352
40	5.7704			40	9.4274			40	9.712			40	8.9677			40	5.5314
41	6.5049			41	8.6576			41	9.2039			41	9.9896			41	3.8718
42	6.0818			42	8.1684			42	9.758			42	9.0414			42	4.5112
43	6.7302			43	9.4641			43	9.2245			43	9.901			43	6.862
44	6.8861			44	9.6297			44	9.1843			44	9.9523			44	7.3505
45	8.1331			45	10.041			45	7.8893			45	9.0013			45	6.9027
46	6.7029			46	9.4939			46	8.7915			46	9.9041			46	4.9903
47	5.6167			47	9.519			47	10.657			47	10.135			47	4.8038
48	7.1322			48	8.9084			48	10.601			48	10.091			48	8.3018
49	6.288			49	9.0055			49	10.607			49	10.814			49	5.7913
50	6.6476			50	8.5504			50	8.3649			50	9.0183			50	5.9074
51	6.1439			51	7.6335			51	11.311			51	11.929			51	5.0019
52	5.7921			52	9.1742			52	9.5194			52	9.8806			52	4.6435
53	6.9721			53	8.8231			53	9.885			53	9.5574			53	5.2099
54	7.1588			54	9.5855			54	9.265			54	9.5223			54	4.1186
55	5.7892			55	8.5009			55	8.7735			55	9.3416			55	2.8658
56	6.4354			56	9.281			56	9.2454			56	9.9037			56	4.0757
57	5.9531			57	8.3164			57	9.2031			57	9.357			57	3.9714
58	7.5215			58	9.136			58	8.8681			58	9.7661			58	7.3319
59	6.1619			59	8.64			59	10.337			59	10.482			59	3.7121
60	6.726			60	8.7213			60	8.8386			60	10.253			60	5.8416
61	6.1966			61	8.7836			61	10.784			61	9.8138			61	6.3579
62	6.3183			62	9.2639			62	7.8119			62	9.542			62	4.4455
63	5.7066			63	9.0965			63	11.509			63	10.587			63	6.9206
64	6.2418			64	8.2828			64	9.6361			64	9.7279			64	4.3797
65	6.1265			65	9.3568			65	10.162			65	11.328			65	4.4619
66	7.2295			66	9.3495			66	9.8825			66	10.989			66	7.3323
67	5.9136			67	9.5777			67	10.209			67	10.775			67	4.2425
68	7.0178			68	9.8806			68	8.3433			68	8.4498			68	4.7818
69	7.5057			69	9.3472			69	8.3479			69	10.332			69	9.6033
70	6.3672			70	8.8098			70	10.143			70	11.767			70	5.307
71	6.4454			71	8.23			71	8.3481			71	8.7606			71	4.8369
72	6.5729			72	8.7759			72	10.518			72	9.7496			72	4.471
73	6.538			73	8.6598			73	10.142			73	10.064			73	6.648
74	8.0491			74	9.5177			74	9.3634			74	9.7553			74	6.5949
75	5.9524			75	8.8924			75	8.7852			75	8.834			75	6.7968
76	6.5111			76	9.8199			76	9.704			76	10.471			76	7.1022
77	6.3274			77	8.646			77	9.6975			77	10.129			77	7.2444
78	6.559			78	8.4435			78	8.4724			78	10.794			78	5.7786
79	6.6174			79	9.7326			79	8.0578			79	10.186			79	5.7798
80	6.3708			80	8.6744			80	10.005			80	10.67			80	4.0772
81	6.5848			81	9.3045			81	11.019			81	10.887			81	7.3961
82	4.8099			82	9.5278			82	8.2785			82	8.1136			82	4.056
83	6.8424			83	8.7566			83	10.527			83	10.559			83	7.1727
84	5.9007			84	8.6671			84	9.8242			84	10.455			84	7.0799
85	6.2786			85	9.5218			85	8.3423			85	8.0882			85	5.4077
86	5.8587			86	8.6559			86	10.705			86	10.664			86	4.9915
87	8.118			87	9.6433			87	8.3728			87	9.9262			87	7.6973
88	6.2551			88	9.5697			88	9.1715			88	9.9911			88	7.6513
89	5.528			89	9.1225			89	10.603			89	10.12			89	6.5339
90	6.0752			90	8.4679			90	8.8073			90	9.3551			90	4.2823
91	5.7256			91	8.9659			91	9.2978			91	9.5796			91	5.4028
92		5.6434		92		8.7779		92		8.319		92		8.7631		92		2.388
93		5.4791		93		9.5317		93		9.7064		93		9.8675		93		7.4427
94		4.8162		94		8.3263		94		10.02		94		9.9146		94		1.824
95		5.8126		95		9.7781		95		9.6654		95		9.9038		95		7.6499
96		5.7478		96		8.666		96		9.089		96		10.038		96		2.5207
97		5.8028		97		9.2425		97		8.9651		97		8.8826		97		4.6402
98		5.954		98		9.0155		98		7.9739		98		7.8401		98		3.0849
99		4.3609		99		9.027		99		8.4851		99		8.7887		99		4.1642
100		4.7698		100		8.8858		100		9.3587		100		8.4821		100		4.9426
101		4.8675		101		8.7923		101		8.5038		101		8.1021		101		2.3074
102		6.499		102		9.2414		102		9.226		102		8.6975		102		5.1998
103		5.9855		103		9.4113		103		8.7063		103		7.8957		103		4.4102
104		4.7987		104		8.9841		104		8.9402		104		8.5369		104		5.0803
105		5.524		105		9.197		105		7.7851		105		7.3114		105		2.7108
106		5.7427		106		9.6849		106		8.8473		106		8.9149		106		5.0419
107		6.0323		107		9.1224		107		8.7637		107		8.3825		107		5.0378
108		6.0756		108		9.1893		108		9.1248		108		9.1052		108		5.2169
109		5.5131		109		8.624		109		8.8327		109		8.1585		109		3.3885
110		5.395		110		9.1466		110		9.6543		110		10.042		110		4.4772
111		5.7422		111		9.0727		111		9.6119		111		9.7656		111		4.8727
112		4.6125		112		8.9672		112		8.9433		112		8.3685		112		3.7694
113		4.3832		113		9.6502		113		9.0124		113		7.7638		113		3.5172
114		5.9636		114		9.2165		114		8.3255		114		9.2808		114		5.2652
115		4.5931		115		9.0629		115		10.094		115		9.6644		115		5.0552
116		5.4494		116		8.5243		116		8.8783		116		8.9443		116		4.0672
117		6.392		117		9.7194		117		9.2278		117		10.611		117		6.9096
118		5.8255		118		8.8387		118		9.0817		118		8.8795		118		3.3044
119		5.0266		119		9.5587		119		9.0096		119		9.0188		119		5.5257
120		5.2637		120		9.0906		120		9.0187		120		9.4556		120		3.8887
121		5.8941		121		9.5214		121		9.7676		121		8.8356		121		3.0188
122		5.6043		122		9.2185		122		8.8802		122		8.8396		122		4.6594
123		5.171		123		8.7153		123		9.8889		123		8.9236		123		5.192
124		6.2732		124		9.624		124		9.1835		124		8.6524		124		3.2015
125		5.8561		125		9.3352		125		9.3479		125		9.0186		125		5.9577
126		5.6508		126		9.4591		126		9.0238		126		7.8686		126		3.0644
127		5.8966		127		9.2814		127		8.9997		127		8.4004		127		3.0648
128		5.5187		128		9.2708		128		9.4772		128		9.0451		128		3.7924
129		5.8956		129		9.552		129		10.412		129		10.309		129		4.3781
130		4.642		130		9.3023		130		8.8881		130		8.3313		130		3.9105
131		6.3822		131		7.9509		131		8.2616		131		8.0033		131		3.4946
132		4.3438		132		8.8368		132		10.259		132		10.136		132		2.1575
133		5.6728		133		9.0517		133		9.2595		133		8.2712		133		3.89
134		5.8925		134		9.1827		134		8.9398		134		7.4021		134		4.2919
135		5.9484		135		9.0889		135		9.2204		135		8.8523		135		4.5459
136		5.9571		136		9.4452		136		8.753		136		7.3369		136		2.7555
137		6.3465		137		9.0434		137		9.5407		137		9.3755		137		5.5799
138		5.2359		138		9.4578		138		9.5149		138		9.3179		138		4.6141
139		7.2353		139		9.6903		139		9.1001		139		10.179		139		7.4764
140		6.6075		140		8.8142		140		9.2223		140		10.127		140		8.365
141		6.5021		141		8.7549		141		10.673		141		10.113		141		4.6651
142		6.6627		142		9.4308		142		8.8619		142		8.7436		142		4.4182
143		6.0864		143		9.5405		143		9.0888		143		9.3757		143		7.0187
144		6.6494		144		9.1921		144		8.5055		144		8.9531		144		5.8037
145		5.8769		145		9.3596		145		9.7361		145		9.7284		145		5.0104
146		5.019		146		9.0271		146		8.4067		146		7.8144		146		4.1051
147		6.3694		147		9.1948		147		11.154		147		10.958		147		2.1923
148		5.7209		148		8.3672		148		8.797		148		9.4093		148		5.0132
149		6.4718		149		8.9731		149		8.1617		149		8.9408		149		6.6305
150		5.845		150		8.9381		150		8.7271		150		8.413		150		4.4096
151		6.0458		151		9.5589		151		8.6527		151		7.7781		151		3.9119
152		5.2278		152		9.2737		152		8.9361		152		9.2749		152		5.1019
153		6.3513		153		9.4357		153		9.2418		153		9.2597		153		4.1814
154		6.6844		154		9.4701		154		8.4811		154		8.2525		154		5.3191
155		5.6902		155		8.9146		155		9.3179		155		8.5409		155		5.6989
156		7.4066		156		9.9514		156		8.6559		156		9.8021		156		8.6275
157		5.752		157		9.2727		157		8.9091		157		7.9438		157		4.1701
158		5.9988		158		9.2346		158		8.488		158		7.9583		158		5.1637
159		6.0579		159		8.5717		159		9.4894		159		9.3166		159		5.9297
160		2.7943		160		9.3748		160		9.5317		160		7.9867		160		2.4528
161		2.4401		161		9.5519		161		9.4694		161		8.8645		161		3.2516
162		6.2801		162		9.6574		162		8.6556		162		8.9237		162		3.4868
163		5.7067		163		8.9358		163		8.4209		163		8.7057		163		4.7323
164		5.53		164		8.9139		164		9.1197		164		8.651		164		4.8938
165		6.4074		165		9.4157		165		10.069		165		10.405		165		3.7261
166		4.5193		166		9.0233		166		9.0005		166		10.012		166		2.6491
167		5.7567		167		9.252		167		9.4429		167		10.004		167		4.7886
168		6.1005		168		8.9854		168		8.7827		168		8.8666		168		6.3547
169		6.8278		169		9.177		169		8.9127		169		8.5551		169		3.9339
170		7.714		170		9.3599		170		9.4402		170		10.293		170		8.1098
171		5.7031		171		9.6424		171		9.2017		171		9.139		171		5.4846
172		6.7799		172		8.6991		172		9.284		172		9.6883		172		6.8595
173		6.2984		173		8.6045		173		8.5395		173		9.6442		173		5.4987
174		5.4682		174		8.5472		174		8.8565		174		8.8811		174		3.5366
175		6.8663		175		9.4787		175		8.6211		175		9.527		175		5.5275
176		5.9178		176		9.0154		176		8.6988		176		7.9598		176		4.5801
177		6.243		177		8.2163		177		10.026		177		10.899		177		4.7758
178		6.1465		178		8.8665		178		9.4567		178		8.8578		178		4.6731
179		4.5548		179		9.0591		179		8.8695		179		8.5182		179		4.3665
180		6.8838		180		9.6432		180		9.0386		180		8.7932		180		6.8955
181		4.9821		181		9.4068		181		9.7348		181		9.1889		181		4.2052
182		7.1541		182		9.6659		182		8.5985		182		8.9776		182		5.7876
183		4.9332		183		9.2532		183		8.4355		183		8.3687		183		4.1822
184		6.489		184		9.0582		184		9.3992		184		8.8985		184		5.0758
185		6.2483		185		9.1449		185		9.134		185		8.278		185		4.023
186		5.9615		186		9.7638		186		8.9881		186		8.3929		186		3.6314
187		5.9378		187		9.2077		187		9.3255		187		8.6293		187		4.3304
188		5.9469		188		9.3392		188		8.5769		188		7.9057		188		3.8097
189		6.4185		189		9.1045		189		8.5016		189		7.3074		189		2.974
190		5.4646		190		8.8927		190		9.5592		190		9.1274		190		4.2214
191		6.1487		191		9.3377		191		9.2127		191		9.8931		191		6.3632
192		6.0774		192		9.2653		192		9.4454		192		8.9919		192		2.236
193		5.8062		193		9.7562		193		8.8628		193		10.983		193		9.1208
194		6.1277		194		9.1608		194		10.18		194		10.347		194		5.368
195		6.5818		195		9.3295		195		8.5594		195		8.0982		195		3.0319
196		6.2403		196		9.646		196		9.2335		196		9.6755		196		7.1564
197		4.9581		197		8.7158		197		9.4664		197		8.7763		197		5.1043
198		5.7862		198		8.9927		198		8.4351		198		7.6378		198		3.881
199		5.8503		199		8.2376		199		8.346		199		8.785		199		4.0686
200		6.7942		200		9.0017		200		9.2491		200		10.11		200		3.6521
201		6.1139		201		8.8157		201		9.1872		201		9.3422		201		5.7707
202		7.2374		202		9.3856		202		8.5079		202		9.0316		202		6.9494
203		6.7245		203		8.8348		203		8.9199		203		9.7426		203		6.9482
204		2.5246		204		9.2757		204		9.0098		204		8.3995		204		3.2794
205		6.0768		205		9.4501		205		9.7711		205		8.6956		205		3.7436
206		5.8939		206		8.9626		206		8.3127		206		8.1741		206		2.9179
207		5.4206		207		9.0676		207		8.9637		207		9.1309		207		5.6397
208		6.1868		208		8.9555		208		8.6954		208		9.5813		208		6.4643
209		5.8942		209		9.2293		209		8.5122		209		8.5473		209		5.6931
210		4.5829		210		9.1742		210		9.2901		210		9.9751		210		6.4925
211		6.1009		211		8.3428		211		8.6504		211		8.0013		211		5.0923
212		6.3705		212		9.5458		212		9.4033		212		9.7382		212		6.3298
213		6.3177		213		8.4534		213		9.3261		213		9.9574		213		5.0273
