# Supplementary material for: Activation of the P2RX7/IL-18 pathway in immune cells attenuates lung fibrosis
Source: eLife. 2024 Feb 1;12:RP88138. doi: 10.7554/eLife.88138 (PMC10945561; doi:10.7554/eLife.88138)
Supplement: Figure 2—figure supplement 1—source data 1. [file elife-88138-fig2-figsupp1-data1.xlsx]

## Sheet: Fig2 Sup fig1
Panel 1C
	WT							P2rx7-/-
vehicle	2.5	2.78636	3.14058	3.98333	3.26697	3.85854	2.9898	1.07639	1.76871	1.19497	1.67111	1.69558	1.75959
HEI3090	2.20667	2.90979	2.96751	2.42857	1.9382	0.87276	2.04737	1.86084	3.25128	1.89461	3.97222	0.594872
Panel 1D upper left panel			Panel 1D upper right panel			Panel 1D lower left panel			Panel 1D lower right panel
vehicle	HEI3090		vehicle	HEI3090		vehicle	HEI3090		vehicle	HEI3090
2.024	8.5766		7.2	4.22		34.5	25.8		29.57	30.88
9.905	14.9275		17.17	10.95		34.7	32.155		27.38	35.96
4.305	12.128		5.48	12.57		28.75	29.592		22.76	38.9
8.222	39.3533		20.17	3.65		32.44	34.12		26.37	27.79
7.746	0.34		7.83	6.82		27.98	46.2		30	34.65
14.5825			3.54	24.09		33.58	28.395		26.89	26.19
			18.98	17.236		39.23			26.35	28.904
			21.42	19.008					26.514	26.704
			10.36	36.47					28.176	29.56
			36.43						30.1
