# Supplementary material for: Activation of the P2RX7/IL-18 pathway in immune cells attenuates lung fibrosis
Source: eLife. 2024 Feb 1;12:RP88138. doi: 10.7554/eLife.88138 (PMC10945561; doi:10.7554/eLife.88138)
Supplement: Figure 2—source data 1. [file elife-88138-fig2-data1.xlsx]

## Sheet: Fig2
Panel 2C				Panel 2D			Panel 2F			Panel 2I			Panel 2J			Panel 2L			Panel 2M
	Vehicle	HEI3090		Vehicle	HEI3090		Vehicle	HEI3090		Vehicle	HEI3090		Vehicle	HEI3090		Vehicle	HEI3090		Vehicle	HEI3090
1	2.13655	1.44149		52.3	48.8		66.46	34.22		2.5	2.20667		46.5	31.9		76.09	68.56		1.07639	1.86084
2	3.41808	1.97418		50.4	49.6		54.68	57.35		2.78636	2.90979		38.7	29.9		97.12	71.08		1.76871	3.25128
3	2.49808	2.19157		50.3	56.2		65.16	50.97		3.14058	2.96751		42.1	30.5		102.55	81.23		1.19497	1.89461
4	3.21541	1.04016		52	50.7		70.11	10		3.98333	2.42857		40.7	46.3		97.85	71.32		1.67111	3.97222
5	3.625	1.79651		52.5	50.7		70.21	64.2		3.26697	1.9382		38.8	47.9		90.77	69.52		1.69558	0.594872
6	3.08503	0.497126		61.3	48.3		60.03	60.91		3.85854	0.87276		41.5	35.8		87.52			1.75959
9	2.84635	2.195		54.6	47.6		57.8	55.84		2.9898	2.04737		38.8	30.7		85.68
10	1.66389	1.9204		52.9			68.23						45.1	31.9
11		1.80072												36.4
12		0.743421
13
14
15
16
17
18
19
20
