# Supplementary material for: Activation of the P2RX7/IL-18 pathway in immune cells attenuates lung fibrosis
Source: eLife. 2024 Feb 1;12:RP88138. doi: 10.7554/eLife.88138 (PMC10945561; doi:10.7554/eLife.88138)
Supplement: Figure 3—figure supplement 1—source data 1. — Italic values correspond to excluded data due to staining problems. [file elife-88138-fig3-figsupp1-data1.xlsx]

## Sheet: Fig3 Sup fig 1
1A left panel		1A right panel			Panel 1B left		Panel 1B right			Panel 1C
Vehicle	HEI3090	Vehicle	HEI3090		Vehicle	HEI3090	Vehicle	HEI3090		Vehicle	HEI3090
12.9	15.4	24.4	13.8		2.40688	2.69048	2.74112	2.24779		67.8	63.2
16.5	16.5	20.3	14.4		2.40446	2.31392	1.46366	2.33894		65.3	65.8
13.3	16.5	23.2	13.7		2.52496	2.95499	3.12775	3.63889		61.2	53.5
13.7	15.2	16.6	5.52		3.45238	2.63852	3.1	11,73469*		71.3	52.6
14.8	13.3	14.3	9.68		2.90663	3.52406	4.26426	2.23361		60.5	66.4
	18.1		18.2			3.46491		2.07831			69.1
	20.7		21.7			3.0665		3.27526			61.8
	13.3		19.6			2.21105		2.20249			70.9
1E			1F NK		Panel 1F T cells		Panel 1F foxp3		Panel 1F Treg		Panel 1F T CD8
Vehicle	HEI3090		Vehicle	HEI3090	Vehicle	HEI3090	Vehicle	HEI3090	Vehicle	HEI3090	Vehicle	HEI3090
25.2	31.1		6.286	3.946	6.743	5.171	5.24	3.757	8.731	7.257	9.037	8.434
28.5	28.9		5	4.29	6.462	5.455	4.846	3.917	8.257	8.041	9.088	7.957
32	18.4		5.769	4.161	5.418	4.871	3.064	3.253	7.492	6.352	9.911	7.726
23.1	15.4		5.32	4.38	5.708	4.712	4.033	3.6	7.457	7.199	7.534	7.049
22	22.7		5.085	3.828	4.969	4.364	3.48	3.203	7.419	6.55	8.092	7.406
21.6	27.8		4.854	3.774	5.198	6.753	3.936	4.364	6.579	8.821	8.684	10.943
	17			4.087		4.893		3.641		7.613		7.884
	20					4.557		3.238		6.949		7.831
					Panel 1G left		Panel 1G middle		Panel 1G right
					Vehicle	HEI3090	Vehicle	HEI3090	Vehicle	HEI3090
					15305	16801	1025	343	1609	761
					15399	18339	402	441	1077	1002
					17027	12885	610	221	1386	587
					16116	15313	509	130	1351	213
					15430	18478	365	317	774	430
						11883		209		748
						11195		186		538
						8819		177		465
					Panel D
						T cells (CD3+NK1.1-)								T CD4+								T CD8+								γδT								B cells								Alveolar Macrophages
					Vehicle	33.8	21,9*	59,5*	25.2	16,7*	27.9	34.5	35.5	16.7	9*	27,9*	12.7	5,36*	12.7	15.6	17	10.5	8,78*	27,5*	7.97	7,3*	8.97	12	12.2	4.45	1,4*	1,37*	2.31	1,48*	3.21	3.54	3.18	5.78	8,99*	5,51*	6.95	5,14*	6.8	7.35	7.58	13.6	15,3*	11,6*	33.9
					HEI3090	40.2	24.5	34.4	54.5	49.6	27.6	29.3	27.3	19.8	13.9	15.7	25.1	23.4	14.9	14.2	12.3	15.1	7.11	13.9	24.8	21.6	7.97	8.68	8.86	2.7	1.64	2.13	1.77	2.26	2.38	3.39	3.39	7.8	5.88	7	6.15	8.43	5.78	7.02	6.93	21.2	27.5	25.8	11.5
[truncated: 52 more columns]
