# Supplementary material for: Activation of the P2RX7/IL-18 pathway in immune cells attenuates lung fibrosis
Source: eLife. 2024 Feb 1;12:RP88138. doi: 10.7554/eLife.88138 (PMC10945561; doi:10.7554/eLife.88138)
Supplement: Figure 3—figure supplement 2—source data 1. — Italic values correspond to excluded data due to staining problems. [file elife-88138-fig3-figsupp2-data1.xlsx]

## Sheet: Feuil1
Panel B
	T cells (CD3+NK1.1-)															T CD4+															T CD8+															γδT
Vehicle	37.9	36.9	39.2	42.1	47.4	50.8	46	39	39,9*	43,4*	45.4	60.4	30.1	37.4	42.1	18.5	18.3	19.2	19.9	21.5	24.2	22.4	18.5	19,8*	23,1*	23.1	24.2	15	19	21.9	17.2	16	17.7	19.8	23.6	24.3	20.9	18.1	17,9*	18,2*	20.4	33.8	12.5	16.3	18	0.7	0.98	0.7	0.82
HEI3090	39.3	50.7	58,9*	50.7	46.1	40.3	40.7	42.2	50.4	41.2	46	48.5	49.5	45.4	50.2	20.1	23	28,2*	26	24.8	21.2	20.6	20.6	25.6	21	23.8	23.1	24.2	23.7	23.7	16.8	25	28,4*	22.1	18.8	16.2	17.4	19.5	22.8	18	19.8	23.2	23.1	19.4	23.9	0.74	0.92	0,99*	0.92
Panel D
	T cells (CD3+NK1.1-)																				T CD4																				T CD8
Vehicle	36	36	38.4	33.6	37.4	39.2	42,6*	40,2*	38,2*	47	37,6*	34,4*	32.6	31.5	35.6	34.9	30.4	34.8	30.8	35.4	21.8	19.5	23	19.4	20.2	23.5	23,7*	22,2*	21,1*	26.2	19,5*	18,4*	17.5	16.3	18	18.6	16.1	20	16.5	17.2	12.1	14.4	13.5	11.9	14.8	14.1	16,8*	16*	14,8*
HEI3090	44.2	44.6	41.1	45.1	44.3	46.9	36.7	33.7	40.4	47.3	41.5	39.8	35.6	31.7	43.5	38.2	35.9	39.4	36.4		24.7	25.9	21.8	24.5	22.7	26.1	20	17.8	23	25.9	21.2	21.6	18.1	15.4	23.2	19.5	18.3	17.8	19.4		17.3	16.8	16.8	18.9	19.2	18.7	14.6	13.7	15.6
[truncated: 116 more columns]
