# Supplementary material for: Activation of the P2RX7/IL-18 pathway in immune cells attenuates lung fibrosis
Source: eLife. 2024 Feb 1;12:RP88138. doi: 10.7554/eLife.88138 (PMC10945561; doi:10.7554/eLife.88138)
Supplement: Figure 3—source data 1. [file elife-88138-fig3-data1.xlsx]

## Sheet: Fig 3
Panel 3A			Panel 3B left			Panel 3B right
Vehicle	HEI3090		Vehicle	HEI3090		Vehicle	HEI3090
0.528689	1.11594		16.2	12.7		60.1	56.6
0.812808	1.14583		14.3	16.7		68.4	55.7
0.573276	1.20438		14.2	13.1		62.5	60.3
0.825301	1.37397		12.4	11.5		62.6	47
1.03496	0.994505		14.2	10.9		54.5	49.6
	0.953917			13.8			70.5
	0.678571			18.8			69.4
				12.4			58.4
Panel 3C left		Panel 3C right p			Panel 3D left		Panel 3D left right
Vehicle	HEI3090	Vehicle	HEI3090		Vehicle	HEI3090	Vehicle	HEI3090
5.91	5.65	21.791	21.675		60	41.2	3.295	2.377
9.77	7.14	23.45	20.879		55.9	42.2	2.959	2.656
4.54	3.6	21.533	21.79		54.8	50.8	3.224	2.688
4	0.98	22.982	21.424		57.4	36	3.138	2.772
3.33	4.88	21.962	21.163		52.1	27.4	2.838	1.934
	6.64		20.524		51.9	61.1	2.894	3.59
	5.74		20.324			52.7		2.887
	5.63		20.789			45.5		2.795
Panel 3E			Panel 3F			Panel 3G
Vehicle	HEI3090		Vehicle	HEI3090		Vehicle	HEI3090
6.7	2.04		13.6	21.2		10.5	4.53
2.61	2.4		33.9	27.5		6.99	5.46
3.58	1.72		22.9	25.8		8.14	4.56
3.16	0.85		15.7	11.5		8.38	1.39
2.37	1.72		22.1	19.1		5.02	2.33
	1.76			26.5			6.29
	1.66			25.4			4.81
	2.01			25.5			5.27
