# Supplementary material for: Activation of the P2RX7/IL-18 pathway in immune cells attenuates lung fibrosis
Source: eLife. 2024 Feb 1;12:RP88138. doi: 10.7554/eLife.88138 (PMC10945561; doi:10.7554/eLife.88138)
Supplement: Figure 4—figure supplement 2—source data 1. [file elife-88138-fig4-figsupp2-data1.xlsx]

## Sheet: Fig4 Sup fig2
Panel 4B			Panel 4C
Vehicle	HEI3090		Vehicle	HEI3090
0.977912	1.54314		2.67983	1.11667
2.09434	1.35038		2.37097	0.113333
	1.51244		1.28395	0.891892
0.70935	1.71005		2.0614	1.3963
2.78713	0.882479		1.3858	0.646341
	1.09694		1.23413
Panel 4D			Panel 4E
Vehicle	HEI3090		WT	Nlrp3-/-	Il18-/-	Il1b-/-
125.353	94.462		11.7	17.1	8.77	17.5
145.947	145.947		12.7	10.5	9.13	18.1
115.056	73.868		8.45	9.35	11.6
125.353	12.086		12.4	13.1	11.1
125.353	1.789		10.4
115.056	22.383		9.69
63.571	53.274		9.25
73.868	125.353
94.462	42.977
42.977	53.274
53.274	73.868
125.353	63.571
73.868	135.65
	73.868
	145.947
	84.165
	94.462
	84.165
