# Supplementary material for: Activation of the P2RX7/IL-18 pathway in immune cells attenuates lung fibrosis
Source: eLife. 2024 Feb 1;12:RP88138. doi: 10.7554/eLife.88138 (PMC10945561; doi:10.7554/eLife.88138)
Supplement: Figure 4—source data 1. [file elife-88138-fig4-data1.xlsx]

## Sheet: Fig4 Sup fig1
	panel C
	Vehicle	HEI3090
	2.83862	0.516204
	2.53939	2.74339
	2.72831	1.35944
	2.16667	1.95707
	1.8252	1.24317
	2.38312	2.23005
		1.22146
